# Supplementary material for: Fabrication Flexible and Luminescent Nanofibrillated Cellulose Films with Modified SrAl2O4: Eu, Dy Phosphors via Nanoscale Silica and Aminosilane
Source: MDPI journal article supplement (doi:10.3390/nano8050352), 2018-05-22

## Supporting Information

**Figure S1.** SEM micrographs of  $\text{SrAl}_2\text{O}_4: \text{Eu}^{2+}, \text{Dy}^{3+}$  (SAOED) phosphors before and after coated modification: (a) native SAOED phosphors; (b)  $\text{SiO}_2$  coated SAOED ( $\text{SiO}_2@\text{SAOED}$ ); (c) APTMS coated  $\text{SiO}_2@\text{SAOED}$  phosphors ( $\text{NH}_2@\text{SiO}_2@\text{SAOED}$ ).

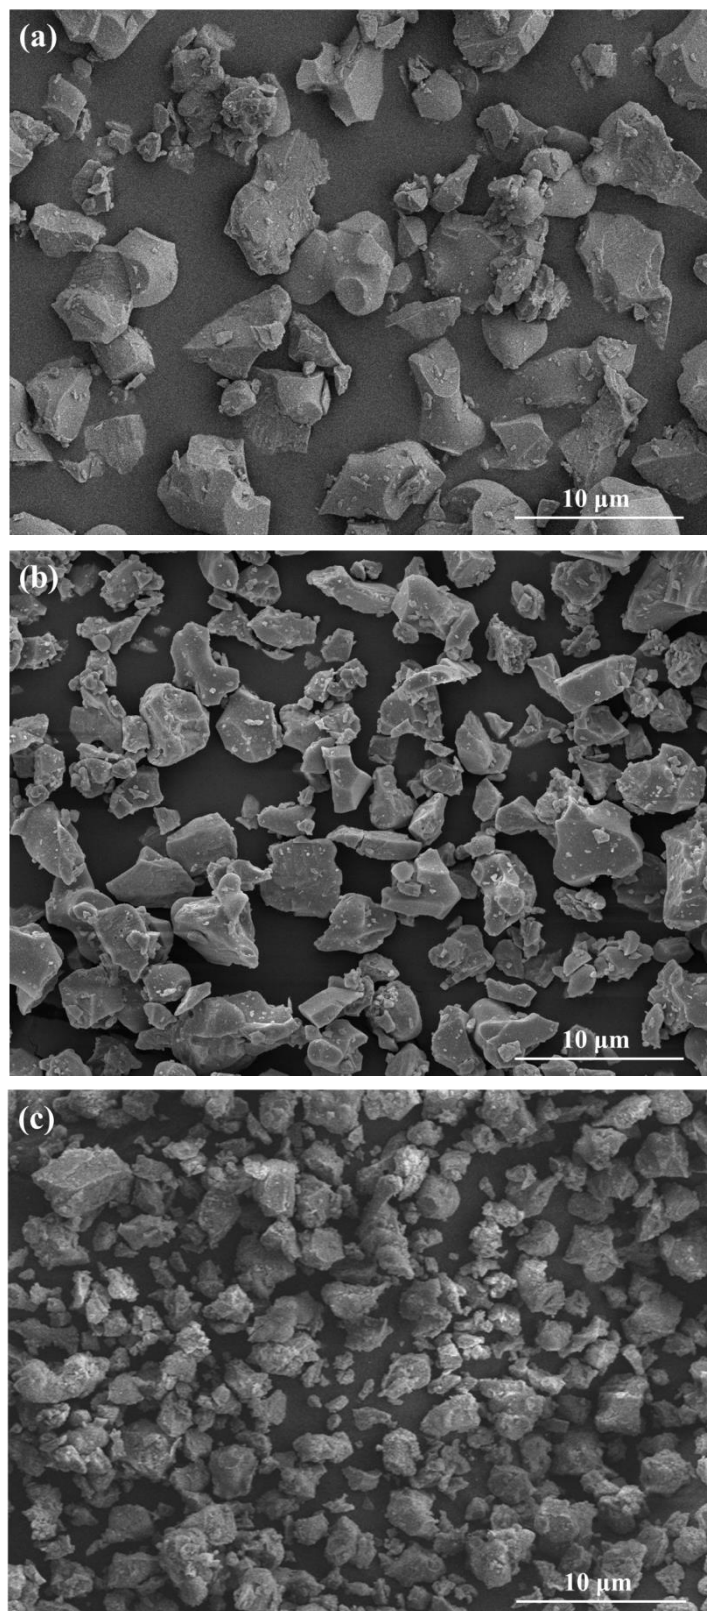

Supplement: s1 [file s1]
